# Supplementary material for: Simple and effective purification of a SGLT-2 inhibitor cocrystal Rongliflozin l-pyroglutamic acid: coformer-induced purification
Source: Royal Society of Chemistry journal article supplement (doi:10.1039/d1ce01305j), 2021-01-01

## Supporting Information

### **A Simple and Effective Purification of a SGLT-2 Inhibitor Cocrystal Rongliflozin L-Pyroglutamic acid: Coformer-induced Purification (CoIP)**

Dao-Qian Chen, \* †‡ Zheng Gu, \* †‡, Yu-Sheng Wu, †‡ Wei-Hui Yuan, †‡ Zheng Li†‡

† State Key Laboratory of Anti-Infective Drug Development, Sunshine Lake Pharma  
Co., Ltd, Dongguan 523871, P. R. China;

‡HEC Pharm Group, HEC Research and Development Center, Dongguan 523871, P.  
R. China

#### **Table of Contents**

|          |                                    |
|----------|------------------------------------|
| <b>2</b> | <b>General remarks</b>             |
| <b>2</b> | <b>Synthesize of 3</b>             |
| <b>2</b> | <b>Kilogram scale Process of 1</b> |
| <b>4</b> | <b>S1-S8</b>                       |
| <b>8</b> | <b>Spectrum of 3 and 1</b>         |

## General remarks

PXRD were monitored on Empyrean Powder X-ray diffractometer. NMR spectras were recorded on a Bruker advance III HD 600 spectrometer in CDCl<sub>3</sub> at 599 MHz (<sup>1</sup>H NMR), 151 MHz (<sup>13</sup>C NMR). High-resolution mass spectral analysis (HRMS) data were measured on Agilent 1260/6545 Q-TOF. IR date were measured on Nicolet IS10.

## Synthetize of 3

(1R,2S,3S,4R,5S)-5-(4-chloro-3-(4-ethoxybenzyl) phenyl)-1-((R)-1-hydroxyethyl)-6,8-dioxabicyclo [3.2.1] octane-2,3,4-triol form II (**2**) (5 g, 11.1 mmol) was dissolved in ethanol (25 mL). The mixture was heated to 80 °C to form a clear solution then cooled to room temperature and stirred for 1 h. (1R,2S,3S,4R,5S)-5-(4-chloro-3-(4-ethoxybenzyl) phenyl)-1-((R)-1-hydroxyethyl)-6,8-dioxabicyclo [3.2.1] octane-2,3,4-triol ethanolate form III (**3**) was collected by filtration and dried in vacuum for 2 h at 60°C in 98% (5.5 g). <sup>1</sup>H NMR (599 MHz, Chloroform-d) δ 7.35 (s, 1H), 7.26 (d, J = 6.0 Hz, 1H), 7.21 (d, J = 6.0 Hz, 1H), 7.02 (d, J = 6.0 Hz, 2H), 6.73 (d, J = 6.0 Hz, 2H), 5.11 (s, 1H), 4.83 (s, 1H), 4.12 (d, J = 6.0 Hz, 1H), 3.98 – 3.95 (m, 3H), 3.91 (q, J = 6.0 Hz, 3H), 3.88-3.85 (m, 1H), 3.76-3.72 (m, 2H), 3.69-3.64 (m, 3H), 3.27 (d, J = 6.0 Hz, 1H), 2.32 (s, 1H), 1.55 (s, 1H), 1.33 (t, J = 6.0 Hz, 3H), 1.21 (t, J = 7.0 Hz, 3H), 1.15 (d, J = 6.0 Hz, 3H). <sup>13</sup>C NMR (151 MHz, Chloroform-d) δ 157.47, 139.04, 135.56, 135.07, 131.28, 129.82, 129.48, 129.11, 125.81, 114.59, 108.35, 84.68, 77.62, 76.65, 74.36, 69.65, 67.10, 63.51, 58.57, 38.59, 18.48, 17.65, 14.97. HRMS: (ESI) Calcd for C<sub>23</sub>H<sub>27</sub>ClO<sub>7</sub> [M+NH<sub>4</sub>]<sup>+</sup>: 468.1784; Found: 468.1793. IR (KBr, cm<sup>-1</sup>): 3372, 3258, 3046, 3033, 2978, 2937,2914, 2899, 1617, 1583, 1513, 1471, 1456, 1432, 1393, 1241, 1177, 1101, 1051, 829, 811, 799.

## Kilogram scale Process of 1

A mixture of (1R,2S,3S,4R,5S)-5-(4-chloro-3-(4-ethoxybenzyl) phenyl)-1-((R)-1-hydroxyethyl)-6,8-dioxabicyclo [3.2.1] octane-2,3,4-triol ethanolate form III (**3**) (23.45 kg, 47.3 mol), L-pyroglutamic acid (24.31 kg, 4.0 equiv.), EtOH (35.9 L) and H<sub>2</sub>O (70 L) was added into a 300 L reactor at room temperature. The slurry was heated to 65 °C and stirred until it is clear. The clear solution was cooled to 35±5 °C typically. Seed crystal form I (**1**) (0.70 kg, 3% g/g) was added when the solution was cooled to 34 °C and maintained for 1.5 h. Gradually, the slurry was cool to 30 °C and 25 °C in 3 hours, and finally stirred at 25 °C for 24 h. The slurry was collected on a centrifuge filter. The filter cake was washed with a mixed solution of EtOH (31.3 L)/H<sub>2</sub>O (62.7 L) with L-pyroglutamic acid (1.64 kg, 7% g/g) pre-cooled to -15°C. The wet cake was dried under vacuum at 45 °C for 8 h. Pure cocrystal form I (**1**) was obtained as a white solid (24.91 kg, yield 91%). MP (DSC onset) = 96.91 °C. <sup>1</sup>H NMR (599 MHz, DMSO-*d*<sub>6</sub>) δ 12.77 (br, 1H), 7.91 (s, 1H), 7.41 (d, *J* = 2.0 Hz, 1H), 7.39 (d, *J* = 12.0 Hz, 1H), 7.31 (dd, *J* = 12.0, 2.0 Hz, 1H), 7.10 (d, *J* = 2.0 Hz, 2H), 6.83 (d, *J* = 2.0 Hz, 2H), 5.29 (s, 1H), 5.00 (s, 1H), 4.91 (d, *J* = 6.7 Hz, 1H), 4.63 (d, *J* = 6.1 Hz, 1H), 4.06 (dd, *J* = 12.0, 6.0 Hz, 1H), 3.99–3.95 (m, 5H), 3.84 (p, *J* = 6.0 Hz, 1H), 3.77 (d, *J* = 12.0 Hz, 1H), 3.55 (d, *J* = 6.0 Hz, 1H), 3.44 (t, *J* = 12.0 Hz, 2H), 3.38 (s, 4H), 2.35-2.29 (m, 1H), 2.18-2.08 (m, 2), 1.99-1.94 (m, 1H), 1.29 (t, *J* = 12.0 Hz, 3H), 1.17 (d, *J* = 6.0 Hz, 3H). <sup>13</sup>C NMR (151 MHz, DMSO-*d*<sub>6</sub>) δ 177.06, 174.48, 156.96, 138.17, 137.69, 131.16, 129.64, 129.42, 128.46, 126.29, 114.35, 107.60, 85.76, 77.32, 76.21, 72.95, 66.28, 65.00, 62.93, 54.79, 37.73, 29.10, 24.64, 17.90, 14.72. HRMS: (ESI) Calcd for C<sub>23</sub>H<sub>27</sub>ClO<sub>7</sub> [M+NH<sub>4</sub>]<sup>+</sup>: 468.1784, C<sub>5</sub>H<sub>7</sub>NO<sub>3</sub> [M+H]<sup>+</sup>: 130.0499; Found: 468.1774, 130.0490 respectively. IR (KBr, cm<sup>-1</sup>): 3257, 2986, 2927, 1750, 1648, 1513, 1476, 1371, 1264, 1239, 1223, 1206, 1088, 1061, 821.

S1-PXRDs of Form I (1), II (2), III (3) and L-pyroglutamic acid (L-PA).

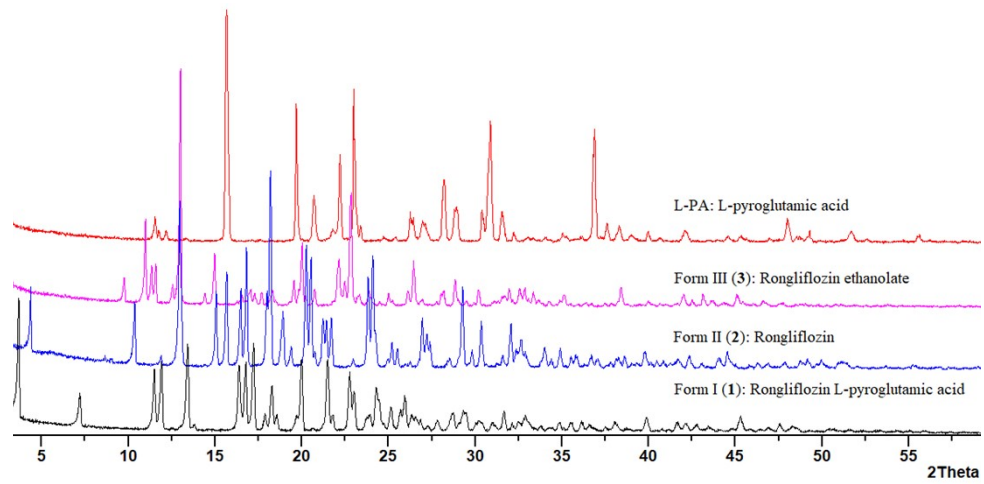

S2-Process-control experiment to monitoring the transformation in process

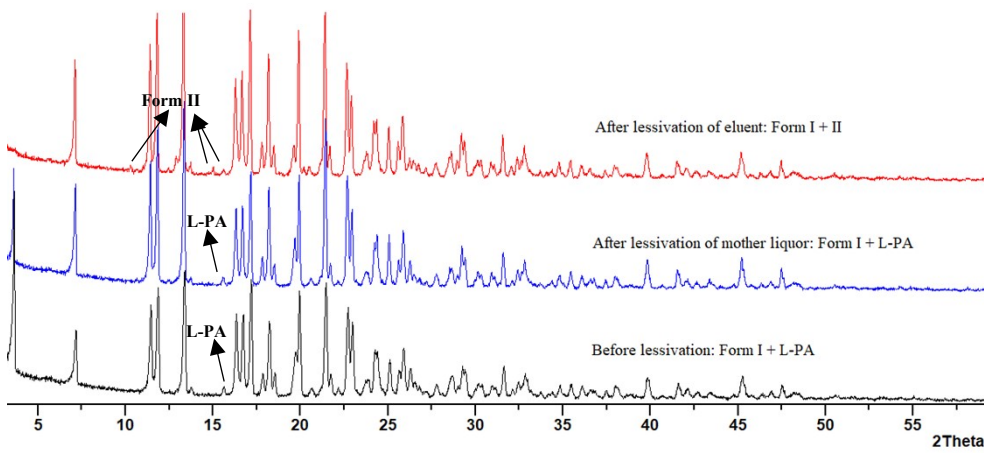

S3-PXRDs for Table 1

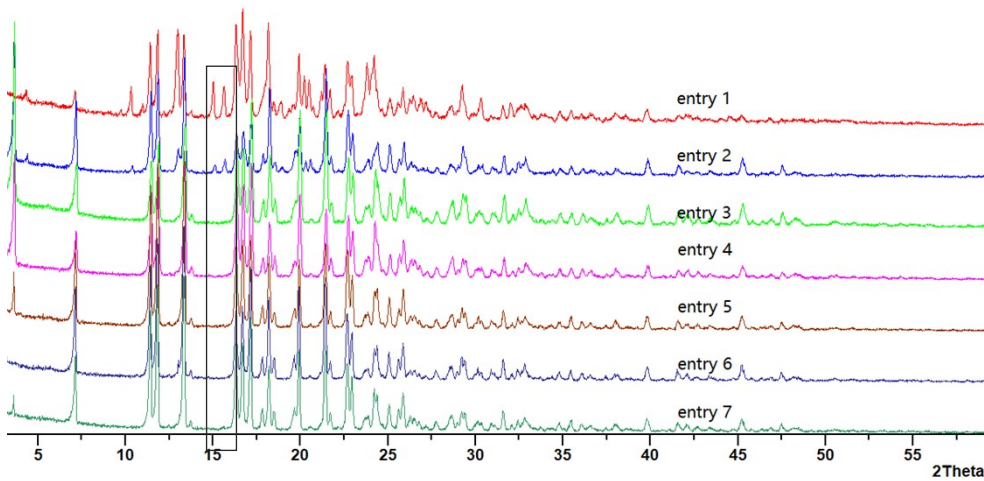

S4-PXRDs for Table 2

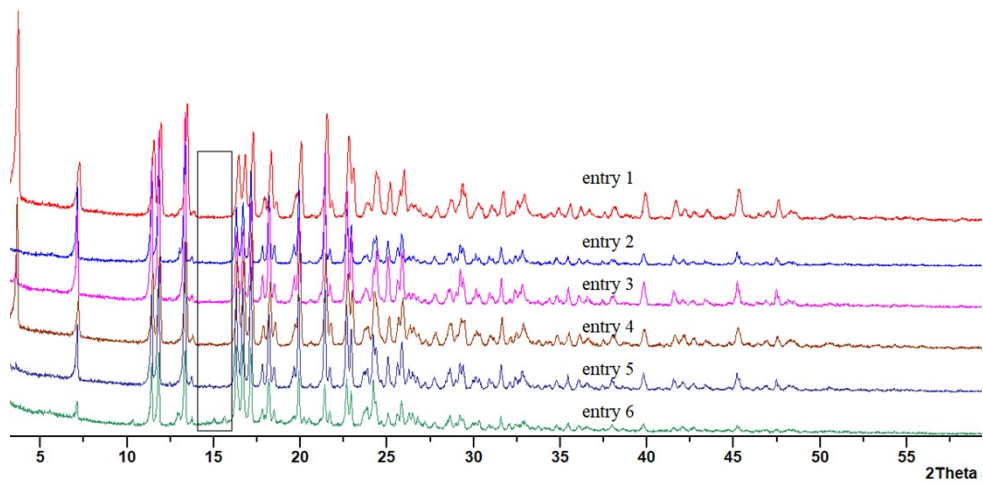

S5-PXRDs for Table 3

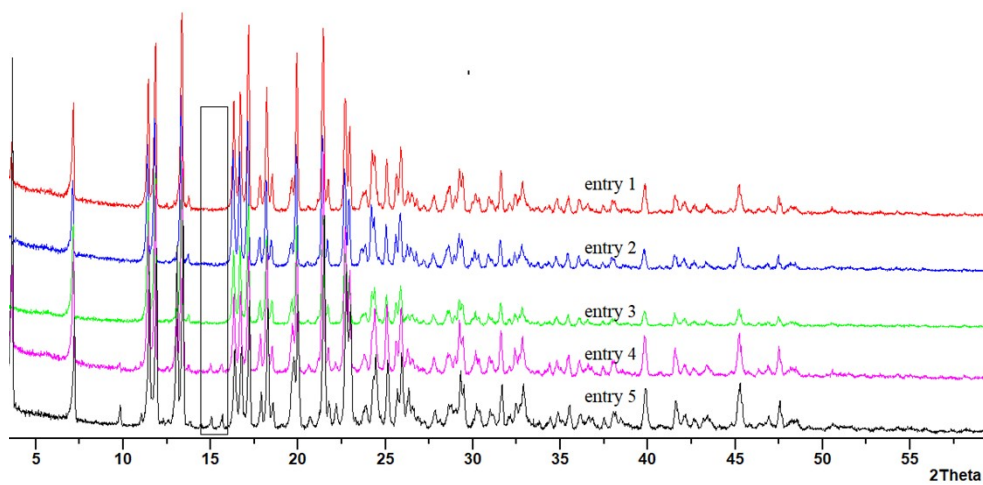

S6-Screening about other parameters and PXRDs

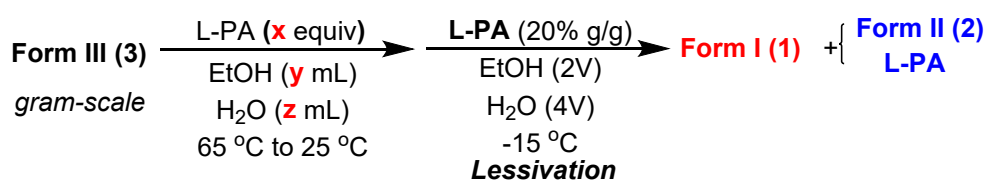

| Entry | 3  | x   | y:z   | y/mL | z/mL | Yield of 1 | PXRD        |
|-------|----|-----|-------|------|------|------------|-------------|
| 1     | 3g | 3.0 | 1:2   | 4.5  | 9.0  | 77%        | Form I + II |
| 2     | 3g | 4.0 | 1:2   | 4.5  | 9.0  | 86%        | Form I      |
| 3     | 3g | 4.5 | 1:2   | 4.5  | 9.0  | 89%        | Form I      |
| 4     | 3g | 5.5 | 1:2   | 4.5  | 9.0  | 78%        | Form I      |
| 5     | 3g | 4.0 | 1:2   | 3.5  | 7.0  | 89%        | Form I      |
| 6     | 3g | 4.0 | 1:2   | 4.0  | 8.0  | 92%        | Form I      |
| 7     | 3g | 4.0 | 1:2   | 5.0  | 10.0 | 91%        | Form I      |
| 8     | 3g | 4.0 | 1:2   | 5.5  | 11   | 91%        | Form I      |
| 9     | 3g | 4.0 | 0:1   | 0    | 13.5 | 90%        | Form I + II |
| 10    | 3g | 4.0 | 1:10  | 1.2  | 12.3 | 81%        | Form I      |
| 11    | 3g | 4.0 | 1:5   | 2.2  | 11.3 | 83%        | Form I      |
| 12    | 3g | 4.0 | 1:3   | 3.3  | 10.2 | 87%        | Form I      |
| 13    | 3g | 4.0 | 1:1.5 | 5.4  | 8.1  | 69%        | Form I      |
| 14    | 3g | 4.0 | 1:1   | 6.8  | 6.8  | 32%        | Form I + II |

Crystal seeds: 3%/g of 3; V: mL/g

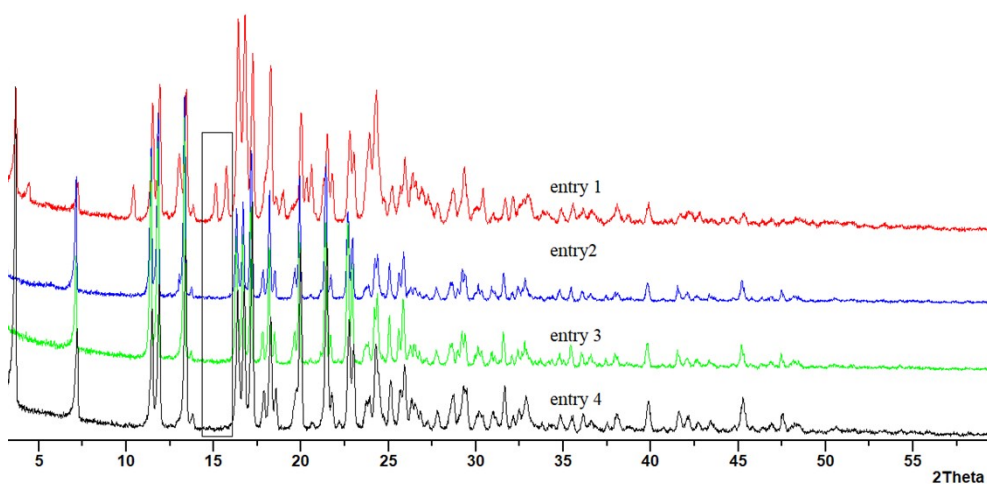

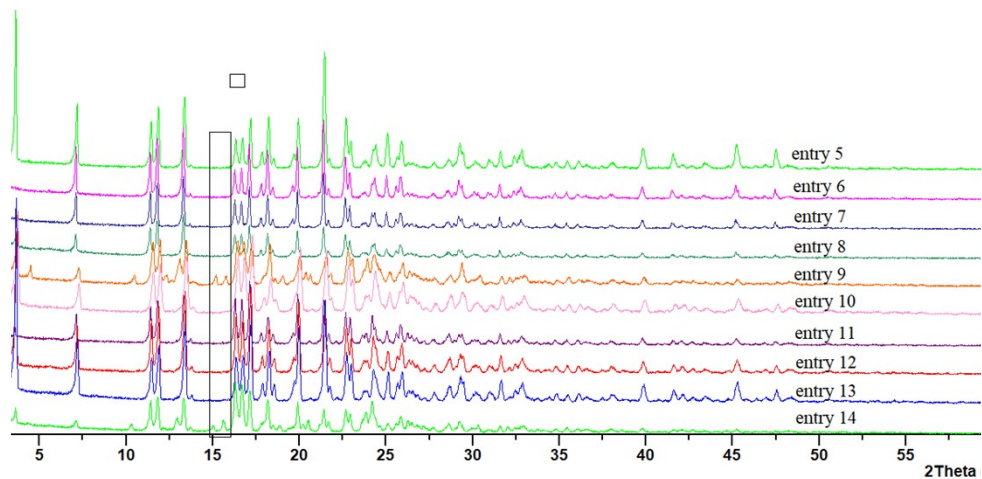

S7-The effect of soak time on purification.

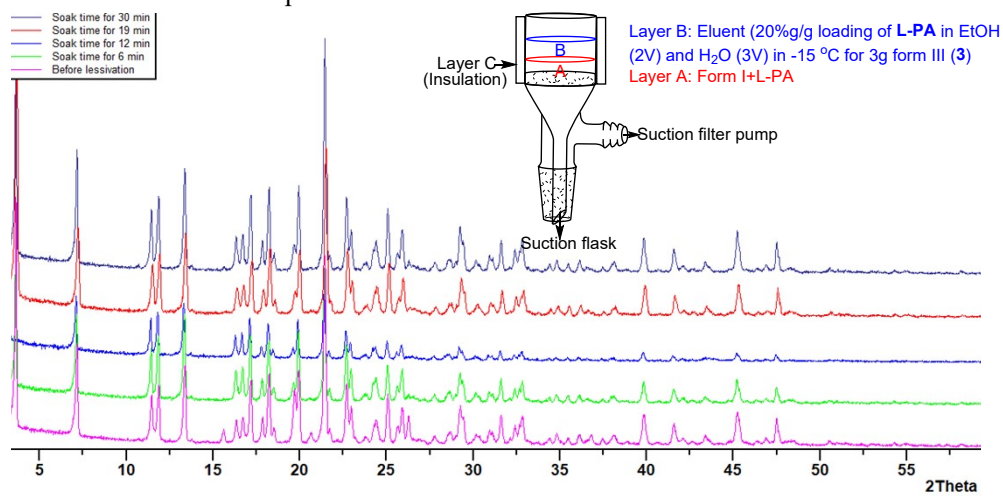

S8-PXRDs in different stages of form I using a centrifuge

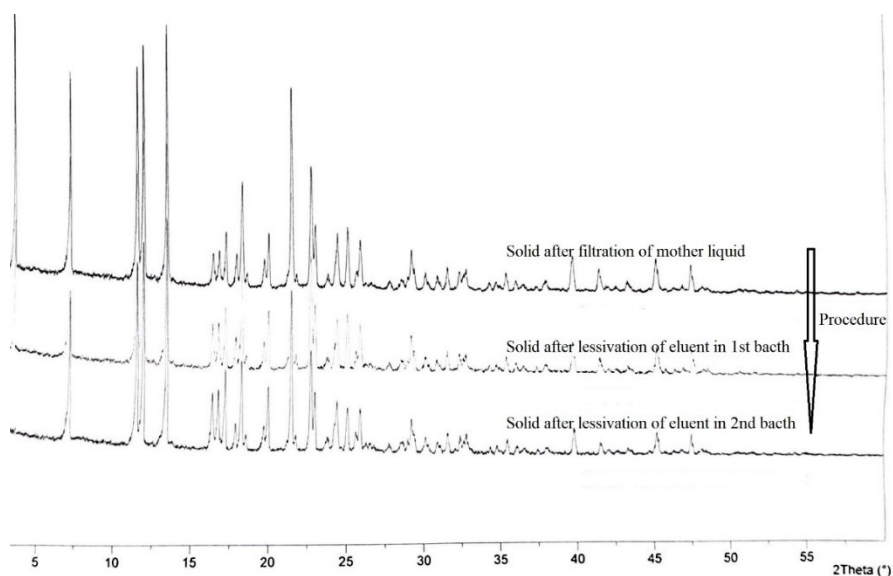

# Spectrum of 3 and 1

<sup>1</sup>H NMR Spectrum of 3 (599 MHz, CDCl<sub>3</sub>)

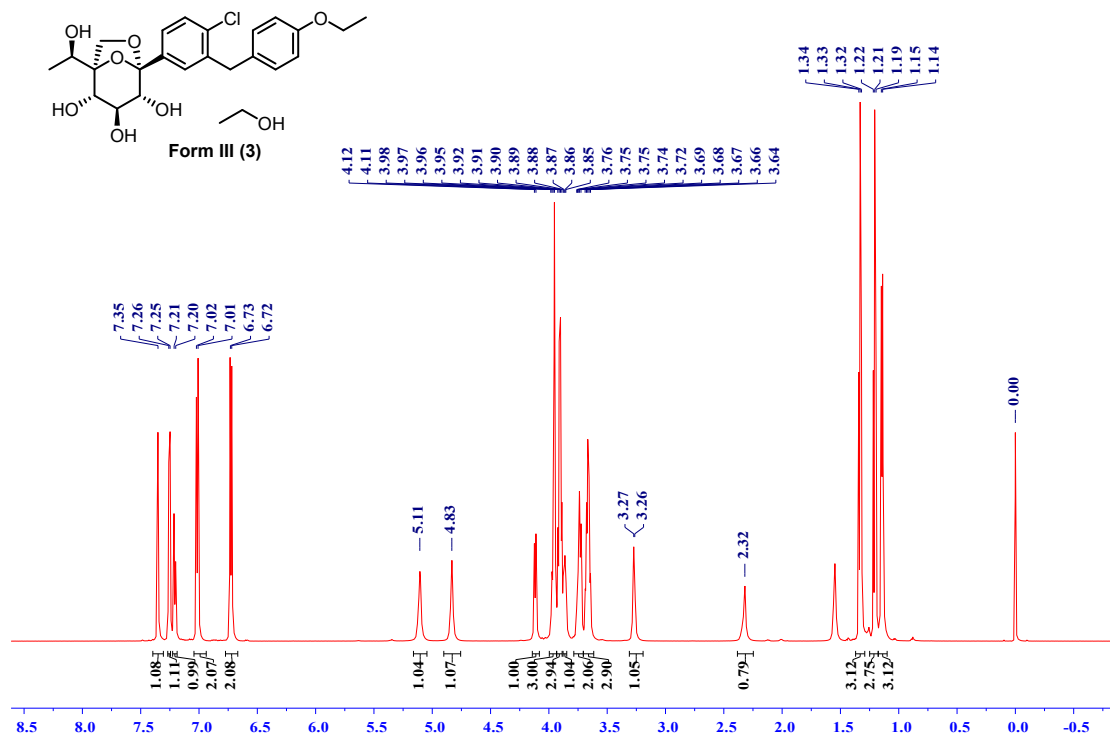

<sup>13</sup>C NMR Spectrum of 4 (151 MHz, CDCl<sub>3</sub>)

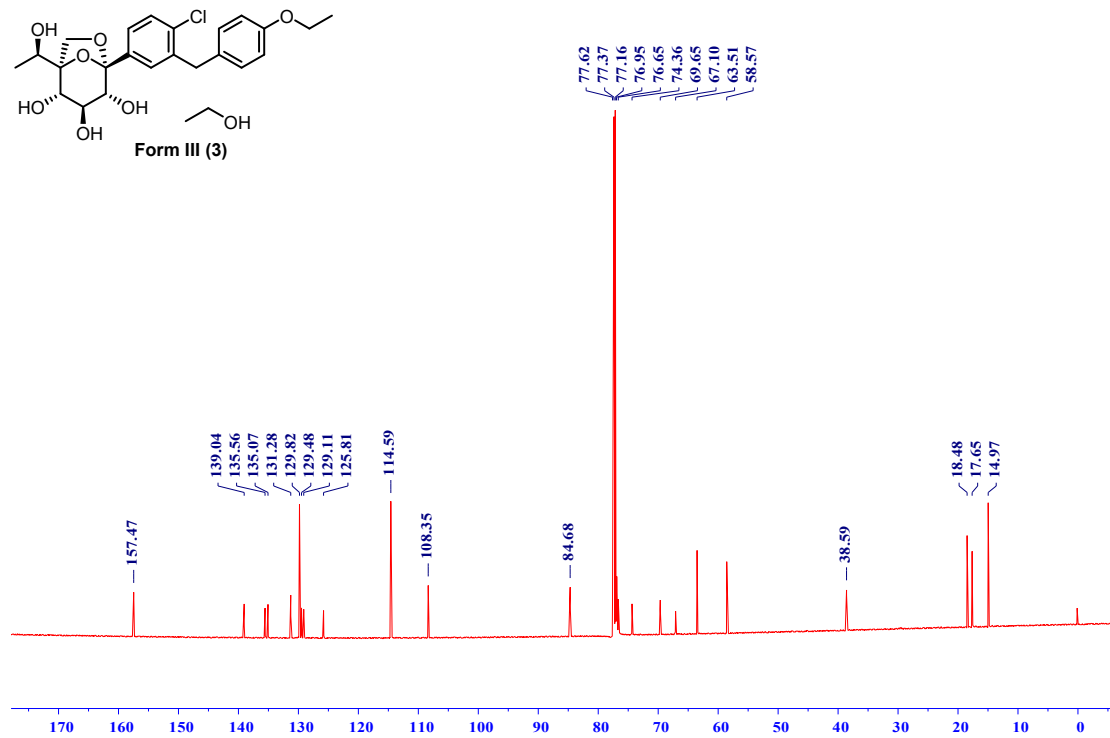



<sup>1</sup>H NMR Spectrum of 1 (599 MHz, CDCl<sub>3</sub>)

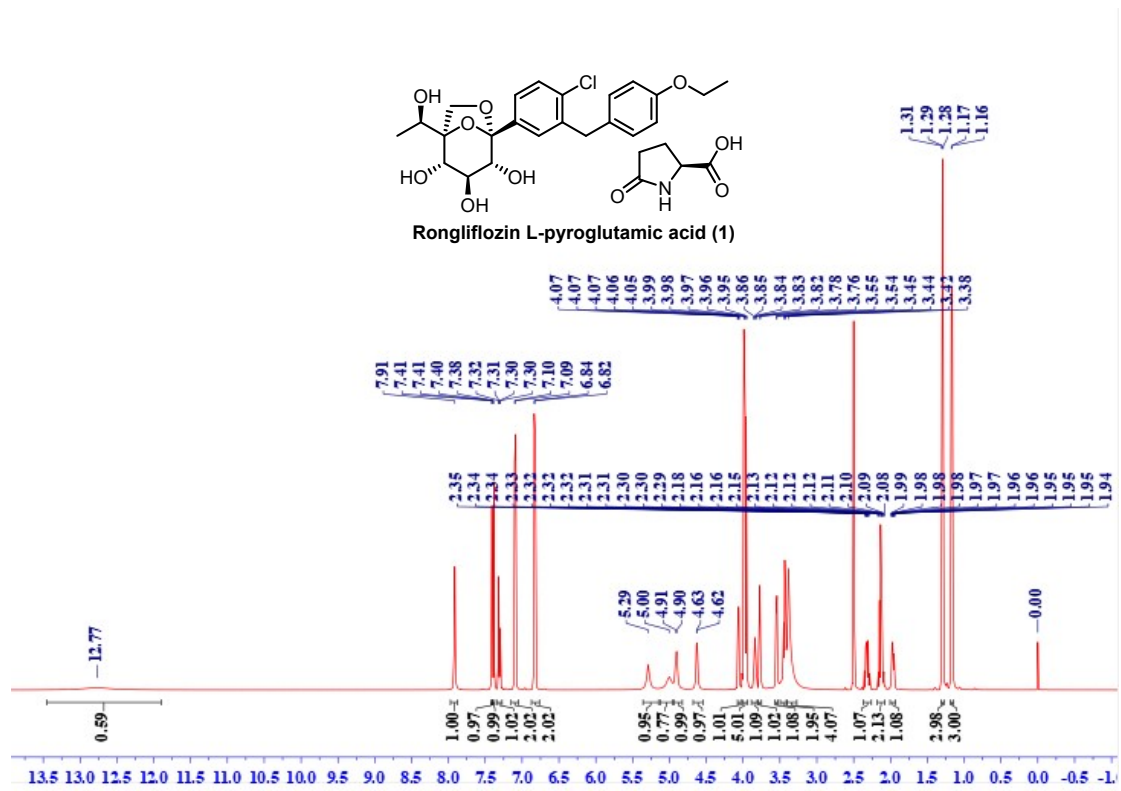

<sup>13</sup>C NMR Spectrum of 1 (151 MHz, CDCl<sub>3</sub>)

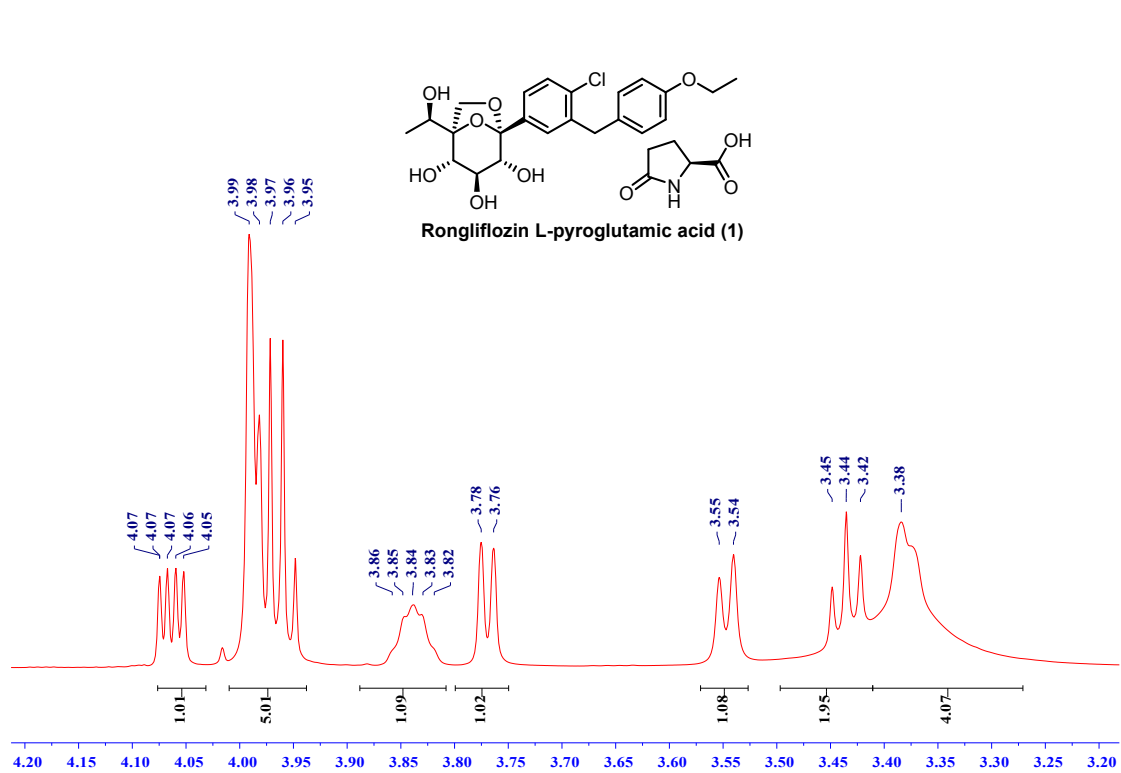

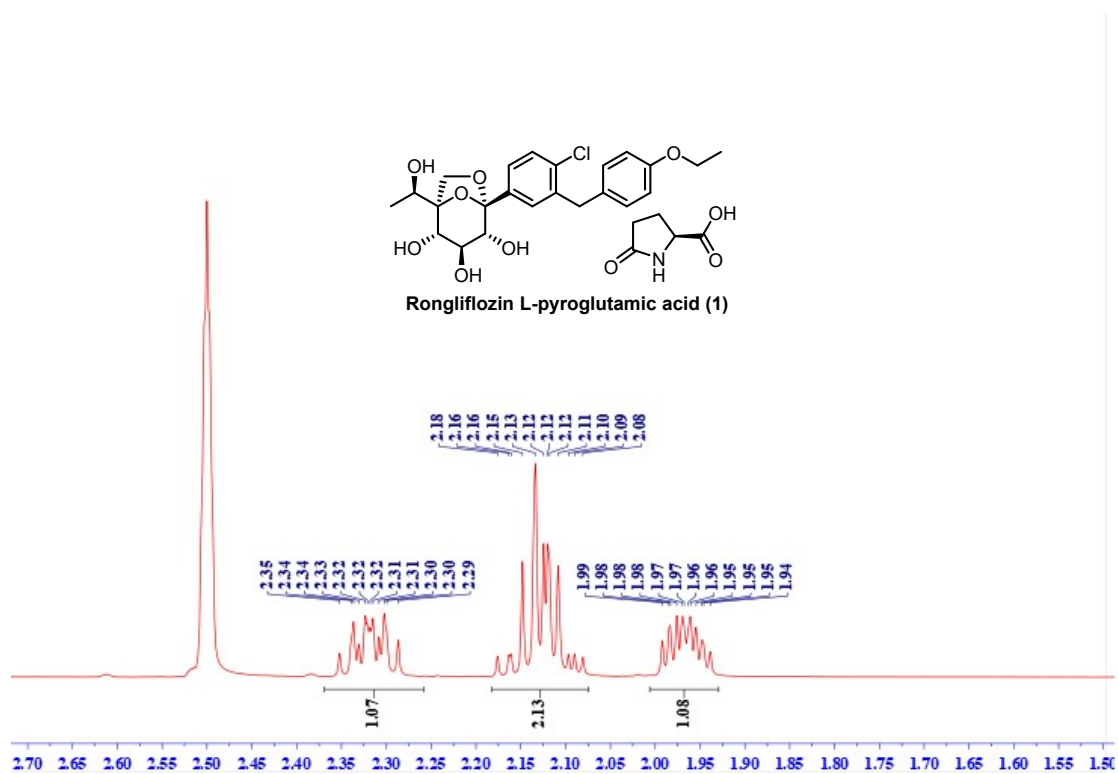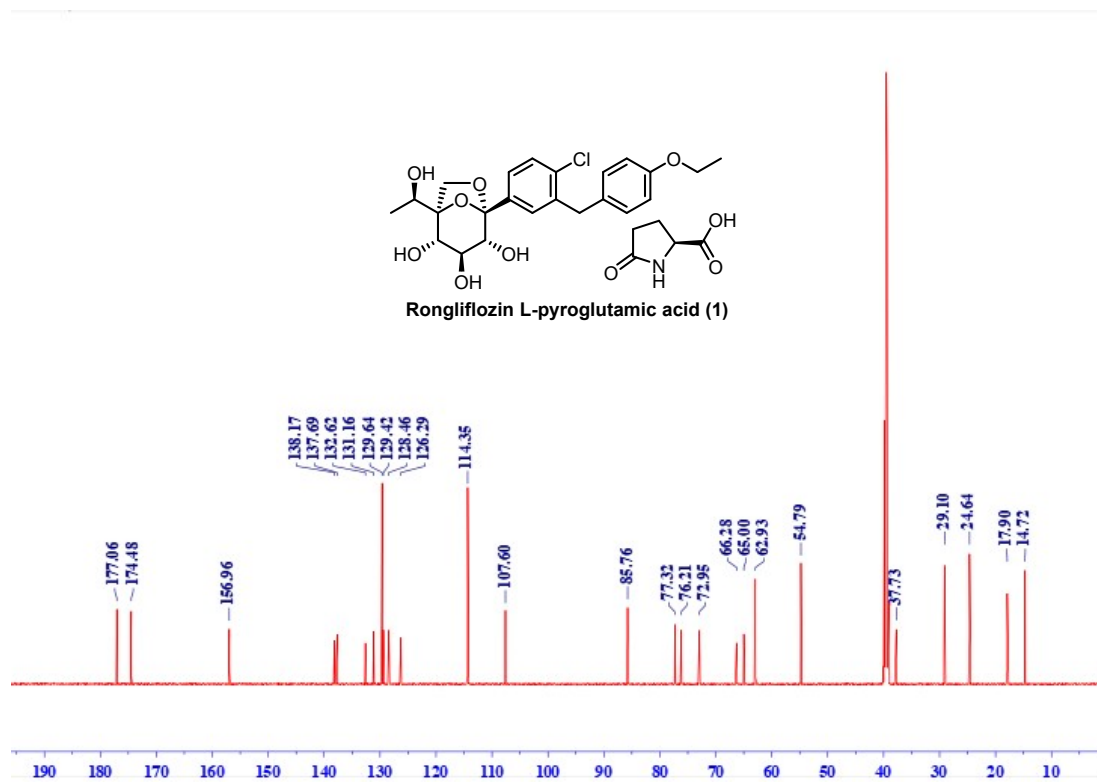

Supplement: d1ce01305j1.pdf [file d1ce01305j1.pdf]
